# Supplementary material for: Alternating ring-opening copolymerization of styrene oxide and maleic anhydride using asymmetrical bis-Schiff-base metal(iii) catalysts
Source: Royal Society of Chemistry journal article supplement (doi:10.1039/c4cy01064g), 2014-09-23
Supplement: c4cy01064g1.pdf [file c4cy01064g1.pdf]

## Supporting Information

### **Alternating ring-opening copolymerization of styrene oxide and maleic anhydride using asymmetrical bis-Schiff-base metal(III) catalysts**

**Dengfeng Liu<sup>a,b,\*</sup>, Xingmei Zhang<sup>a</sup>, Luqun Zhu<sup>a</sup>, Jing Wu<sup>a</sup>, Xingqiang Lü<sup>a,\*</sup>**

<sup>a</sup> *School of Chemical Engineering, Shaanxi Key Laboratory of Degradable Medical Material, Northwest University, Xi'an 710069, People's Republic of China*

<sup>b</sup> *College of Chemistry and Chemical Engineering, Xi'an University of Science and Technology, Xi'an 710054, People's Republic of China*

General procedure for the preparation of the corresponding Co(III)-bis-Schiff-base complexes

$[\text{Co}(\text{L}^n)(\text{OAc})](n=1-5, \mathbf{1-5})$

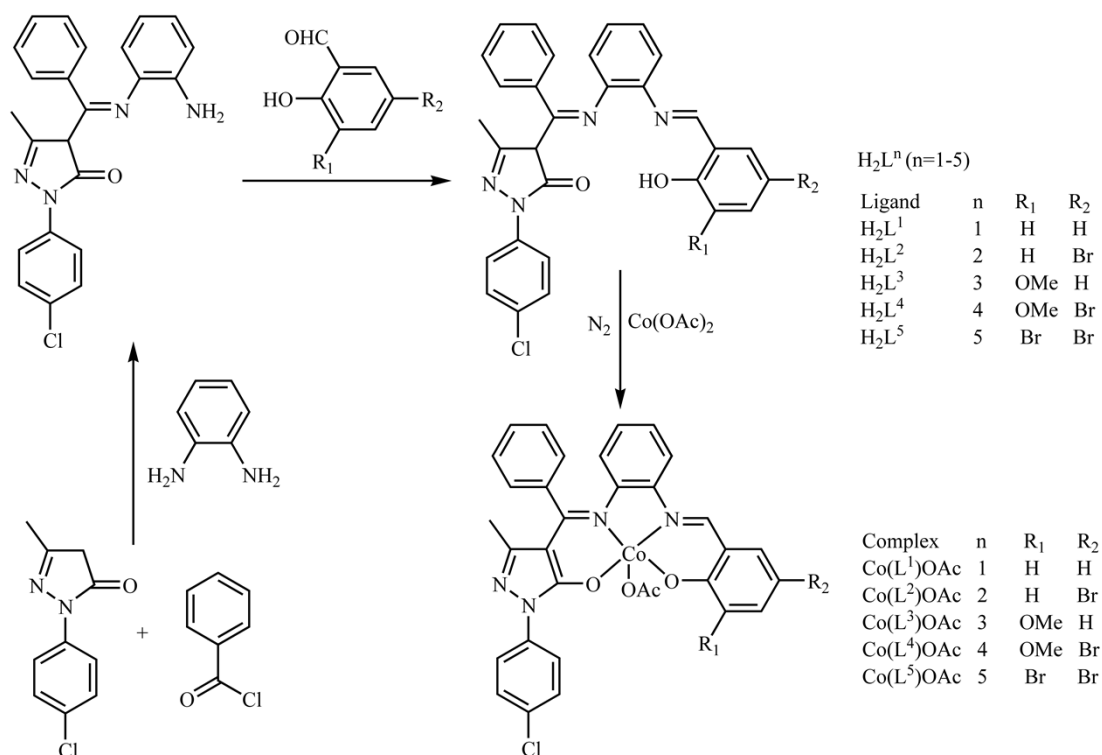

**Scheme S1.** synthetic routes of complexes **1-5**

For  $[\text{Co}(\text{L}^1)(\text{OAc})]$  (**1**): solid  $\text{H}_2\text{L}^1$  (152.1 mg, 0.3 mmol) and anhydride  $\text{Co}(\text{OAc})_2$  (74.7 mg, 0.3 mmol) were added to a flame dried Schlenk flask charged with a Teflon-coated stir bar.

Under an atmosphere of dry  $\text{N}_2$ , absolute  $\text{CH}_2\text{Cl}_2$  (5 ml) and EtOH (5 ml) were injected and the resultant mixture was stirred at ambient temperature for 5 h. The stopper of the flask was removed, and the resultant reddish brown solution was stirred at room temperature for 2 h while exposed to dry air. The final solution was filtered and the clear filtrate was left to stand at room temperature for several days to give the dark brown polycrystalline solid product of **1**.

Yield: 156.0 mg (84%). Anal. calcd for  $\text{C}_{32}\text{H}_{24}\text{CoClN}_4\text{O}_4$ : C, 61.64; H, 3.85; N, 8.99. Found:

C, 61.57; H, 3.92; N, 8.94. FT-IR (KBr,  $\text{cm}^{-1}$ ): 3445 (b), 1628 (vs), 1601 (s), 1560 (s), 1524

(m), 1497 (m), 1466 (s), 1433 (m), 1389 (m), 1360 (w), 1339 (w), 1312 (w), 1271 (w), 1240 (w), 1217 (w), 1117 (m), 1092 (m), 1063 (w), 1013 (w), 928 (w), 833 (w), 750 (w), 723 (w), 619 (w), 598 (m), 538 (m), 517 (m).  $^1\text{H}$  NMR (400 MHz, DMSO- $d_6$ , ppm):  $\delta$  8.32 (s, 1H, -C=N), 8.23 (s, 2H, ArH), 8.03 (d, 1H,  $J = 8.0$  Hz, ArH), 7.59 (d, 3H,  $J = 6.8$  Hz, ArH), 7.51 (t, 4H,  $J = 8.0$  Hz, ArH), 7.36 (d, 1H,  $J = 8.0$  Hz, ArH), 7.27-7.26 (m, 2H, ArH), 6.99 (t, 1H,  $J = 6.0$  Hz, ArH), 6.66 (t, 1H,  $J = 4.8$  Hz, ArH), 6.57 (t, 1H,  $J = 3.6$  Hz, ArH), 6.37 (d, 1H,  $J = 7.6$  Hz, ArH), 1.32 (s, 3H, -CH<sub>3</sub>), 1.06 (s, 3H, -OAc). ESI-MS (in THF):  $m/z$  623.95 [M-H]<sup>+</sup>.

For [Co(L<sup>2</sup>)(OAc)] (**2**): Dark brown polycrystalline product of complex **2** was prepared in the same way as complex **1** except that **H<sub>2</sub>L<sup>2</sup>** (175.8 g, 0.3 mmol) was used instead of **H<sub>2</sub>L<sup>1</sup>** (152.1 mg, 0.3 mmol). Yield: 102.0 mg (48%). Anal. calcd for C<sub>32</sub>H<sub>23</sub>BrCoClN<sub>4</sub>O<sub>4</sub>: C, 54.71; H, 3.18; N, 7.98. Found: C, 54.47; H, 3.26; N, 7.89. FT-IR (KBr, cm<sup>-1</sup>): 3443 (b), 1634 (vs), 1557 (s), 1499 (w), 1464 (w), 1404 (w), 1362 (w), 1339 (w), 1209 (w), 1119 (m), 1034 (w), 993 (w), 928 (w), 831 (w), 781 (w), 723 (w), 617 (w), 540 (m).  $^1\text{H}$  NMR (400 MHz, DMSO- $d_6$ , ppm):  $\delta$  8.31 (s, 1H, -C=N), 8.28 (s, 2H, ArH), 8.00 (d, 1H,  $J = 1.6$  Hz, ArH), 7.73 (s, 1H, ArH), 7.57-7.61 (m, 5H, ArH), 7.32-7.36 (m, 3H, ArH), 7.22 (d, 1H,  $J = 8.0$  Hz, ArH), 7.01 (t, 1H,  $J = 1.6$  Hz, ArH), 6.70 (t, 1H,  $J = 2.0$  Hz, ArH), 6.39 (d, 1H,  $J = 1.2$  Hz, ArH), 1.29 (s, 3H, -CH<sub>3</sub>), 1.06 (s, 3H, -OAc). ESI-MS (in THF):  $m/z$  702.84 [M-H]<sup>+</sup>.

For [Co(L<sup>3</sup>)(OAc)] (**3**): Dark brown polycrystalline product of complex **3** was prepared in the same way as complex **1** except that **H<sub>2</sub>L<sup>3</sup>** (161.1 mg, 0.3 mmol) was used instead of **H<sub>2</sub>L<sup>1</sup>** (152.1 mg, 0.3 mmol). Yield: 145.0 mg (74%). Anal. calcd for C<sub>33</sub>H<sub>26</sub>CoClN<sub>4</sub>O<sub>5</sub>: C, 60.65; H, 3.98; N, 8.58. Found: C, 60.60; H, 4.07; N, 8.51. FT-IR (KBr, cm<sup>-1</sup>): 3453 (b), 1630 (vs), 1560 (s), 1526 (m), 1506 (w), 1472 (s), 1435 (s), 1402 (m), 1387 (m), 1360 (m), 1312

(m), 1240 (m), 1219 (m), 1182 (m), 1107 (m), 1086 (m), 1011 (w), 984 (w), 922 (w), 843 (w), 781 (w), 758 (m), 723 (m), 700 (w), 600 (m), 546 (m), 511 (w), 492 (w).  $^1\text{H}$  NMR (400 MHz, DMSO- $d_6$ , ppm):  $\delta$  8.41 (s, 1H, -C=N), 8.40 (s, 1H, ArH), 8.23 (s, 1H, ArH), 8.03 (d, 1H,  $J$  = 8.0 Hz, ArH), 7.56 (t, 5H,  $J$  = 10.0 Hz, ArH), 7.45 (s, 1H, ArH), 7.36 (d, 1H,  $J$  = 1.6 Hz, ArH), 7.17 (d, 1H,  $J$  = 7.2 Hz, ArH), 6.98 (s, 1H, ArH), 6.87 (t, 1H,  $J$  = 4.0 Hz, ArH), 6.66 (t, 1H,  $J$  = 8.0 Hz, ArH), 6.49 (t, 1H,  $J$  = 7.2 Hz, ArH), 6.35 (d, 1H,  $J$  = 7.2 Hz, ArH), 3.94 (s, 3H, -OCH<sub>3</sub>), 1.28 (s, 3H, -CH<sub>3</sub>), 1.06 (s, 3H, -OAc). ESI-MS (in THF):  $m/z$  654.01 [M-H]<sup>+</sup>.

For [Co(L<sup>4</sup>)(OAc)] (**4**): Dark brown polycrystalline product of complex **4** was prepared in the same way as complex **1** except that **H<sub>2</sub>L<sup>4</sup>** (184.8 mg, 0.3 mmol) was used instead of **H<sub>2</sub>L<sup>1</sup>** (152.1 mg, 0.3 mmol). Yield: 123.0 mg (56%). Anal. calcd for C<sub>33</sub>H<sub>25</sub>BrCoClN<sub>4</sub>O<sub>5</sub>: C, 54.11; H, 3.42; N, 7.65. Found: C, 54.04; H, 3.51; N, 7.58. FT-IR (KBr, cm<sup>-1</sup>): 3441 (b), 2974 (m), 2932 (m), 1626 (vs), 1608 (s), 1585 (m), 1568 (s), 1533 (m), 1530 (m), 1499 (m), 1468 (s), 1437 (s), 1385 (m), 1354 (m), 1327 (m), 1312 (m), 1238 (m), 1217 (m), 1178 (m), 1121 (w), 1090 (m), 1063 (m), 1015 (m), 984 (m), 937 (w), 891 (w), 858 (w), 831 (w), 800 (w), 762 (w), 748 (m), 727 (m), 687 (w), 602 (m), 573 (w), 550 (m), 517 (m), 494 (w), 451 (w).  $^1\text{H}$  NMR (400 MHz, DMSO- $d_6$ , ppm):  $\delta$  8.39 (s, 1H, -C=N), 8.37 (s, 1H, ArH), 8.25 (s, 1H, ArH), 7.99 (d, 1H,  $J$  = 8.0 Hz, ArH), 7.56 (t, 5H,  $J$  = 12.8 Hz, ArH), 7.47-7.43 (m, 1H, ArH), 7.34 (t, 2H,  $J$  = 12.0 Hz, ArH), 7.00 (t, 1H,  $J$  = 6.8 Hz, ArH), 6.93 (s, 1H, ArH), 6.67 (t, 1H,  $J$  = 8.0 Hz, ArH), 6.35 (d, 1H,  $J$  = 8.0 Hz, ArH), 3.93 (s, 3H, -OCH<sub>3</sub>), 1.28 (s, 3H, -CH<sub>3</sub>), 1.07 (s, 3H, -OAc). ESI-MS (in THF):  $m/z$  732.9 [M-H]<sup>+</sup>.

For [Co(L<sup>5</sup>)(OAc)] (**5**): Dark brown polycrystalline product of complex **5** was prepared in the same way as complex **1** except that **H<sub>2</sub>L<sup>5</sup>** (199.4 mg, 0.3 mmol) was used instead of

**H<sub>2</sub>L<sup>1</sup>** (152.1 mg, 0.3 mmol) . Yield: 96.0 mg (41%). Anal. calcd for C<sub>32</sub>H<sub>22</sub>Br<sub>2</sub>CoClN<sub>4</sub>O<sub>4</sub>: C, 49.18; H, 2.82; N, 7.17. Found: C, 49.12; H, 2.93; N, 7.15. FT-IR (KBr, cm<sup>-1</sup>): 3449 (b), 1634 (vs), 1603 (s), 1588 (s), 1570 (s), 1530 (m), 1497 (m), 1468 (s), 1435 (m), 1391 (m), 1362 (m), 1313 (w), 1215 (w), 1155 (m), 1092 (m), 1065 (w), 1032 (w), 1013 (w), 989 (w), 924 (w), 858 (w), 843 (w), 795 (w), 746 (w), 716 (w), 602 (m), 573 (w), 552 (m), 519 (m), 494 (w). <sup>1</sup>H NMR (400 MHz, DMSO-*d*<sub>6</sub>, ppm): δ 8.58 (s, 1H, -C=N), 8.53 (s, 1H, ArH), 8.08 (d, 1H, *J* = 0.8 Hz, ArH), 8.04 (d, 1H, *J* = 1.2 Hz, ArH), 7.87 (s, 2H, ArH), 7.64 (s, 3H, ArH), 7.57 (d, 2H, *J* = 8.0 Hz, ArH), 7.43 (d, 1H, *J* = 5.6 Hz, ArH), 7.23 (t, 1H, *J* = 7.2 Hz, ArH), 7.06 (t, 1H, *J* = 0.8 Hz, ArH), 6.76 (t, 1H, *J* = 8.0 Hz, ArH), 6.50 (d, 1H, *J* = 8.4 Hz, ArH), 1.32 (s, 3H, -CH<sub>3</sub>), 1.06 (s, 3H, -OAc). ESI-MS (in THF): *m/z* 781.74 [M-H]<sup>+</sup>.

$^1\text{H NMR}$  (400 MHz,  $\text{CDCl}_3$ ): 7.72-7.35 (m, 5H, -Ph-), 6.33-6.16 (m, 3H, -Ch-, -CH-), 4.50-4.37 (m, 2H,  $-\text{CH}_2-$ ), 3.49 (s, relative to ether content).

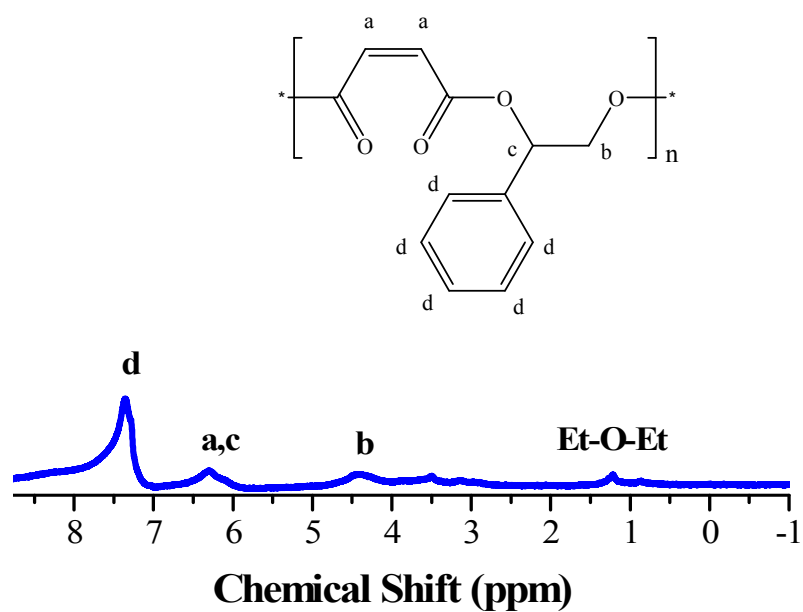

**Figure S1.** Representative  $^1\text{H NMR}$  Spectrum of SO-MA copolymer, Table 3, entry 5.

Copolymer (SO-MA): FT-IR (KBr,  $\text{cm}^{-1}$ ): 3062 (w), 2955 (w), 1735 (vs), 1649 (m), 1573 (w), 1505 (w), 1450 (w), 1400 (m), 1353 (w), 1209 (s), 1158 (s), 1080 (w), 1020 (m), 1000 (m), 867 (w), 815 (w), 758 (m), 701 (m), 639 (w), 520 (w).

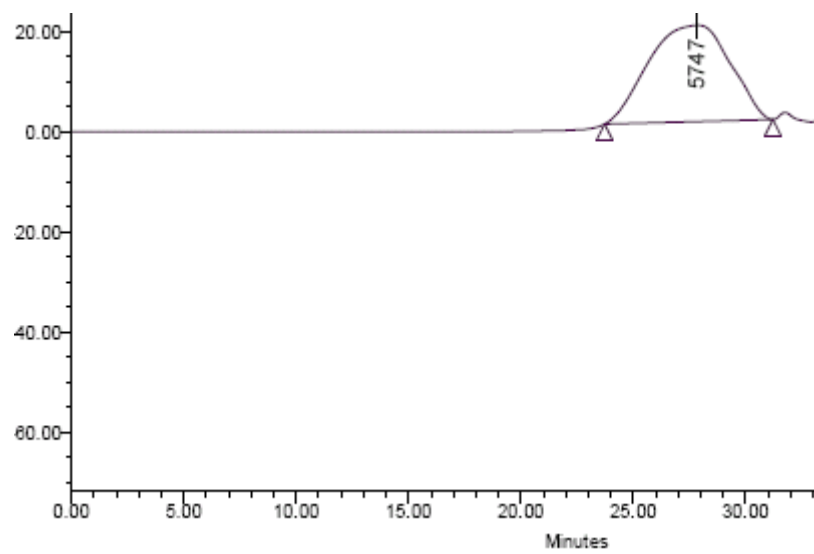

**Figure S2.** Representative GPC graph of alternating copolymers from SO and MA, Table 4, entry 1.
